# Supplementary material
Source: PubMed Central journal article supplement (PMC4357526)
Supplement: jbjsam.n00662_ds01.pdf [file jbjsam.n00662_ds01.pdf]

**TABLE E-1 Definitions of Adverse Events**

| Event                                                             | Definition                                                                                                                                                                                                                                                                                                                                                                                                                                                                                                                                  |
|-------------------------------------------------------------------|---------------------------------------------------------------------------------------------------------------------------------------------------------------------------------------------------------------------------------------------------------------------------------------------------------------------------------------------------------------------------------------------------------------------------------------------------------------------------------------------------------------------------------------------|
| Ventilator use for more than forty-eight hours                    | Total duration of ventilator-assisted respirations during postoperative hospitalization was greater than forty-eight hours.                                                                                                                                                                                                                                                                                                                                                                                                                 |
| Unplanned intubation                                              | Patient requires placement of an endotracheal tube or other similar breathing tube and ventilator support, which is not intended or planned.                                                                                                                                                                                                                                                                                                                                                                                                |
| Stroke or cerebrovascular accident                                | Patient develops an embolic, thrombotic, or hemorrhagic vascular accident or stroke with motor, sensory, or cognitive dysfunction that persists for twenty-four hours or more.                                                                                                                                                                                                                                                                                                                                                              |
| Thromboembolic event (deep vein thrombosis or pulmonary embolism) | Deep vein thrombosis is the identification of a new blood clot or thrombus within a vein (confirmed by a duplex, venogram, or computed tomographic [CT] scan) that required therapy (anticoagulation, placement of a vena cava filter, and/or clipping of the vena cava). Pulmonary embolism is recorded if the patient has a positive ventilation-perfusion (V-Q) scan, CT examination, transesophageal echocardiogram, pulmonary arteriogram, CT angiogram, or any other definitive modality.                                             |
| Surgical site infection                                           | Surgical site infection includes superficial, deep, and organ or space surgical site infections. A superficial surgical site infection is an infection that involves only the skin or subcutaneous tissue. A deep surgical site infection is an infection that extends into the fascial and muscle layers. An organ or space surgical site infection is an infection of any part of the anatomy other than the incision that was manipulated during surgery and includes finding purulent fluid in a drain or identification of an abscess. |
| Sepsis or septic shock                                            | Recorded if patient meets two or more of the systemic inflammatory response syndrome criteria and has documentation of an infection.                                                                                                                                                                                                                                                                                                                                                                                                        |
| Cardiac arrest                                                    | Cardiac arrest requiring the initiation of cardiopulmonary resuscitation (CPR), including chest compressions.                                                                                                                                                                                                                                                                                                                                                                                                                               |
| Myocardial infarction                                             | Documentation of electrocardiogram changes indicative of acute myocardial infarction.                                                                                                                                                                                                                                                                                                                                                                                                                                                       |
| Acute renal failure                                               | In a patient who did not require dialysis preoperatively, the worsening of renal dysfunction postoperatively requiring dialysis.                                                                                                                                                                                                                                                                                                                                                                                                            |
| Return to the operating room                                      | Return to the operating room for any surgical procedure.                                                                                                                                                                                                                                                                                                                                                                                                                                                                                    |
| Wound dehiscence                                                  | A total breakdown of the surgical closure compromising the integrity of the procedure.                                                                                                                                                                                                                                                                                                                                                                                                                                                      |
| Graft, prosthesis, or flap failure                                | Mechanical failure of a prosthesis requiring return to the operating room.                                                                                                                                                                                                                                                                                                                                                                                                                                                                  |
| Peripheral nerve injury                                           | Motor deficits due to peripheral nerve injury, including the sciatic and femoral nerves.                                                                                                                                                                                                                                                                                                                                                                                                                                                    |
| Blood transfusion                                                 | At least one unit of packed or whole red blood cells given from the surgical start time up to and including seventy-two hours postoperatively. Includes cell saver blood.                                                                                                                                                                                                                                                                                                                                                                   |
| Urinary tract infection                                           | Clinical symptoms and positive urinalysis or urine culture.                                                                                                                                                                                                                                                                                                                                                                                                                                                                                 |
| Pneumonia                                                         | Clinical symptoms and radiographic evidence of pneumonia.                                                                                                                                                                                                                                                                                                                                                                                                                                                                                   |
| Progressive renal insufficiency                                   | A rise in creatinine of >2 mg/dL from preoperative value, with no requirement for dialysis.                                                                                                                                                                                                                                                                                                                                                                                                                                                 |
